# Supplementary material for: Earthquake and Electrochemistry: Unraveling the Unpredictable
Source: Research Square preprint supplement (doi:10.21203/rs.3.rs-106129/v1), 2020-12-02
Supplement: Supplementary file 1 [file 7e64d468400967825b04fa87.xlsx]

## Sheet: Sheet1
List of Pourbaix Potential (PP) in a Redox Reaction (DZ is the change of oxidation number during redox process, x is ion-exchange factor, nH+ and ne- is the number of mole hydrogen ion and electron involve during redox process)
DZ	x=nH+/ne-	PP(V)	DZ	x=nH+/ne-	PP(V)	DZ	x=nH+/ne-	PP(V)	DZ	x=nH+/ne-	PP(V)
1	1	0.0591	2	0.5	0.02955	3	0.333333	0.01972	4	0.25	0.01479
	2	0.1182		1	0.0591		0.666667	0.03944		0.5	0.02958
	3	0.1773		1.5	0.08865		1	0.05916		0.75	0.04437
	4	0.2364		2	0.1182		1.33333	0.07888		1	0.05916
	5	0.2955		2.5	0.14775		1.66667	0.0986		1.25	0.07395
	6	0.3546		3	0.1773		2	0.11832		1.5	0.08874
	7	0.4137		3.5	0.20685		2.33333	0.13804		1.75	0.10353
	8	0.4728		4	0.2364		2.66667	0.15776		2	0.11832
	9	0.5319		4.5	0.26595		3	0.17748		2.25	0.13311
	10	0.591		5	0.2955		3.33333	0.1972		2.5	0.1479
	11	0.6501		5.5	0.32505		3.66667	0.21692		2.75	0.16269
	12	0.7092		6	0.3546		4	0.23664		3	0.17748
	13	0.7683		6.5	0.38415		4.33333	0.25636		3.25	0.19227
	14	0.8274		7	0.4137		4.66667	0.27608		3.5	0.20706
	15	0.8865		7.5	0.44325		5	0.2958		3.75	0.22185
	16	0.9456		8	0.4728		5.33333	0.31552		4	0.23664
	17	1.0047		8.5	0.50235		5.66667	0.33524		4.25	0.25143
	18	1.0638		9	0.5319		6	0.35496		4.5	0.26622
	19	1.1229		9.5	0.56145		6.33333	0.37468		4.75	0.28101
	20	1.182		10	0.591		6.66667	0.3944		5	0.2958
	21	1.2411		10.5	0.62055		7	0.41412		5.25	0.31059
	22	1.3002		11	0.6501		7.33333	0.43384		5.5	0.32538
	23	1.3593		11.5	0.67965		7.66667	0.45356		5.75	0.34017
	24	1.4184		12	0.7092		8	0.47328		6	0.35496
	25	1.4775		12.5	0.73875		8.33333	0.493		6.25	0.36975
	26	1.5366		13	0.7683		8.66667	0.51272		6.5	0.38454
	27	1.5957		13.5	0.79785		9	0.53244		6.75	0.39933
	28	1.6548		14	0.8274		9.33333	0.55216		7	0.41412
	29	1.7139		14.5	0.85695		9.66667	0.57188		7.25	0.42891
	30	1.773		15	0.8865		10	0.5916		7.5	0.4437
	31	1.8321		15.5	0.91605		10.3333	0.61132		7.75	0.45849
	32	1.8912		16	0.9456		10.6667	0.63104		8	0.47328
	33	1.9503		16.5	0.97515		11	0.65076		8.25	0.48807
	34	2.0094		17	1.0047		11.3333	0.67048		8.5	0.50286
	35	2.0685		17.5	1.03425		11.6667	0.6902		8.75	0.51765
	36	2.1276		18	1.0638		12	0.70992		9	0.53244
	37	2.1867		18.5	1.09335		12.3333	0.72964		9.25	0.54723
	38	2.2458		19	1.1229		12.6667	0.74936		9.5	0.56202
	39	2.3049		19.5	1.15245		13	0.76908		9.75	0.57681
	40	2.364		20	1.182		13.3333	0.7888		10	0.5916
	41	2.4231		20.5	1.21155		13.6667	0.80852		10.25	0.60639
	42	2.4822		21	1.2411		14	0.82824		10.5	0.62118
	43	2.5413		21.5	1.27065		14.3333	0.84796		10.75	0.63597
	44	2.6004		22	1.3002		14.6667	0.86768		11	0.65076
	45	2.6595		22.5	1.32975		15	0.8874		11.25	0.66555
	46	2.7186		23	1.3593		15.3333	0.90712		11.5	0.68034
	47	2.7777		23.5	1.38885		15.6667	0.92684		11.75	0.69513
	48	2.8368		24	1.4184		16	0.94656		12	0.70992
	49	2.8959		24.5	1.44795		16.3333	0.96628		12.25	0.72471
	50	2.955		25	1.4775		16.6667	0.986		12.5	0.7395
	51	3.0141		25.5	1.50705		17	1.00572		12.75	0.75429
	52	3.0732		26	1.5366		17.3333	1.02544		13	0.76908
	53	3.1323		26.5	1.56615		17.6667	1.04516		13.25	0.78387
	54	3.1914		27	1.5957		18	1.06488		13.5	0.79866
	55	3.2505		27.5	1.62525		18.3333	1.0846		13.75	0.81345
	56	3.3096		28	1.6548		18.6667	1.10432		14	0.82824
	57	3.3687		28.5	1.68435		19	1.12404		14.25	0.84303
	58	3.4278		29	1.7139		19.3333	1.14376		14.5	0.85782
	59	3.4869		29.5	1.74345		19.6667	1.16348		14.75	0.87261
	60	3.546		30	1.773		20	1.1832		15	0.8874
	61	3.6051		30.5	1.80255		20.3333	1.20292		15.25	0.90219
	62	3.6642		31	1.8321		20.6667	1.22264		15.5	0.91698
	63	3.7233		31.5	1.86165		21	1.24236		15.75	0.93177
	64	3.7824		32	1.8912		21.3333	1.26208		16	0.94656
	65	3.8415		32.5	1.92075		21.6667	1.2818		16.25	0.96135
	66	3.9006		33	1.9503		22	1.30152		16.5	0.97614
	67	3.9597		33.5	1.97985		22.3333	1.32124		16.75	0.99093
	68	4.0188		34	2.0094		22.6667	1.34096		17	1.00572
	69	4.0779		34.5	2.03895		23	1.36068		17.25	1.02051
	70	4.137		35	2.0685		23.3333	1.3804		17.5	1.0353
	71	4.1961		35.5	2.09805		23.6667	1.40012		17.75	1.05009
	72	4.2552		36	2.1276		24	1.41984		18	1.06488
	73	4.3143		36.5	2.15715		24.3333	1.43956		18.25	1.07967
	74	4.3734		37	2.1867		24.6667	1.45928		18.5	1.09446
	75	4.4325		37.5	2.21625		25	1.479		18.75	1.10925
	76	4.4916		38	2.2458		25.3333	1.49872		19	1.12404
	77	4.5507		38.5	2.27535		25.6667	1.51844		19.25	1.13883
	78	4.6098		39	2.3049		26	1.53816		19.5	1.15362
	79	4.6689		39.5	2.33445		26.3333	1.55788		19.75	1.16841
	80	4.728		40	2.364		26.6667	1.5776		20	1.1832
	81	4.7871		40.5	2.39355		27	1.59732		20.25	1.19799
	82	4.8462		41	2.4231		27.3333	1.61704		20.5	1.21278
	83	4.9053		41.5	2.45265		27.6667	1.63676		20.75	1.22757
	84	4.9644		42	2.4822		28	1.65648		21	1.24236
	85	5.0235		42.5	2.51175		28.3333	1.6762		21.25	1.25715
	86	5.0826		43	2.5413		28.6667	1.69592		21.5	1.27194
	87	5.1417		43.5	2.57085		29	1.71564		21.75	1.28673
	88	5.2008		44	2.6004		29.3333	1.73536		22	1.30152
	89	5.2599		44.5	2.62995		29.6667	1.75508		22.25	1.31631
	90	5.319		45	2.6595		30	1.7748		22.5	1.3311
	91	5.3781		45.5	2.68905		30.3333	1.79452		22.75	1.34589
	92	5.4372		46	2.7186		30.6667	1.81424		23	1.36068
	93	5.4963		46.5	2.74815		31	1.83396		23.25	1.37547
	94	5.5554		47	2.7777		31.3333	1.85368		23.5	1.39026
	95	5.6145		47.5	2.80725		31.6667	1.8734		23.75	1.40505
	96	5.6736		48	2.8368		32	1.89312		24	1.41984
	97	5.7327		48.5	2.86635		32.3333	1.91284		24.25	1.43463
	98	5.7918		49	2.8959		32.6667	1.93256		24.5	1.44942
	99	5.8509		49.5	2.92545		33	1.95228		24.75	1.46421
	100	5.91		50	2.955		33.3333	1.972		25	1.479
	101	5.9691		50.5	2.98455		33.6667	1.99172		25.25	1.49379
	102	6.0282		51	3.0141		34	2.01144		25.5	1.50858
	103	6.0873		51.5	3.04365		34.3333	2.03116		25.75	1.52337
	104	6.1464		52	3.0732		34.6667	2.05088		26	1.53816
	105	6.2055		52.5	3.10275		35	2.0706		26.25	1.55295
	106	6.2646		53	3.1323		35.3333	2.09032		26.5	1.56774
	107	6.3237		53.5	3.16185		35.6667	2.11004		26.75	1.58253
	108	6.3828		54	3.1914		36	2.12976		27	1.59732
	109	6.4419		54.5	3.22095		36.3333	2.14948		27.25	1.61211
	110	6.501		55	3.2505		36.6667	2.1692		27.5	1.6269
	111	6.5601		55.5	3.28005		37	2.18892		27.75	1.64169
	112	6.6192		56	3.3096		37.3333	2.20864		28	1.65648
	113	6.6783		56.5	3.33915		37.6667	2.22836		28.25	1.67127
	114	6.7374		57	3.3687		38	2.24808		28.5	1.68606
	115	6.7965		57.5	3.39825		38.3333	2.2678		28.75	1.70085
	116	6.8556		58	3.4278		38.6667	2.28752		29	1.71564
	117	6.9147		58.5	3.45735		39	2.30724		29.25	1.73043
	118	6.9738		59	3.4869		39.3333	2.32696		29.5	1.74522
	119	7.0329		59.5	3.51645		39.6667	2.34668		29.75	1.76001
	120	7.092		60	3.546		40	2.3664		30	1.7748
	121	7.1511		60.5	3.57555		40.3333	2.38612		30.25	1.78959
	122	7.2102		61	3.6051		40.6667	2.40584		30.5	1.80438
	123	7.2693		61.5	3.63465		41	2.42556		30.75	1.81917
	124	7.3284		62	3.6642		41.3333	2.44528		31	1.83396
	125	7.3875		62.5	3.69375		41.6667	2.465		31.25	1.84875
	126	7.4466		63	3.7233		42	2.48472		31.5	1.86354
	127	7.5057		63.5	3.75285		42.3333	2.50444		31.75	1.87833
	128	7.5648		64	3.7824		42.6667	2.52416		32	1.89312
	129	7.6239		64.5	3.81195		43	2.54388		32.25	1.90791
	130	7.683		65	3.8415		43.3333	2.5636		32.5	1.9227
	131	7.7421		65.5	3.87105		43.6667	2.58332		32.75	1.93749
	132	7.8012		66	3.9006		44	2.60304		33	1.95228
	133	7.8603		66.5	3.93015		44.3333	2.62276		33.25	1.96707
	134	7.9194		67	3.9597		44.6667	2.64248		33.5	1.98186
	135	7.9785		67.5	3.98925		45	2.6622		33.75	1.99665
	136	8.0376		68	4.0188		45.3333	2.68192		34	2.01144
	137	8.0967		68.5	4.04835		45.6667	2.70164		34.25	2.02623
	138	8.1558		69	4.0779		46	2.72136		34.5	2.04102
	139	8.2149		69.5	4.10745		46.3333	2.74108		34.75	2.05581
	140	8.274		70	4.137		46.6667	2.7608		35	2.0706
	141	8.3331		70.5	4.16655		47	2.78052		35.25	2.08539
	142	8.3922		71	4.1961		47.3333	2.80024		35.5	2.10018
	143	8.4513		71.5	4.22565		47.6667	2.81996		35.75	2.11497
	144	8.5104		72	4.2552		48	2.83968		36	2.12976
	145	8.5695		72.5	4.28475		48.3333	2.8594		36.25	2.14455
	146	8.6286		73	4.3143		48.6667	2.87912		36.5	2.15934
	147	8.6877		73.5	4.34385		49	2.89884		36.75	2.17413
	148	8.7468		74	4.3734		49.3333	2.91856		37	2.18892
	149	8.8059		74.5	4.40295		49.6667	2.93828		37.25	2.20371
	150	8.865		75	4.4325		50	2.958		37.5	2.2185
	151	8.9241		75.5	4.46205		50.3333	2.97772		37.75	2.23329
	152	8.9832		76	4.4916		50.6667	2.99744		38	2.24808
	153	9.0423		76.5	4.52115		51	3.01716		38.25	2.26287
	154	9.1014		77	4.5507		51.3333	3.03688		38.5	2.27766
	155	9.1605		77.5	4.58025		51.6667	3.0566		38.75	2.29245
	156	9.2196		78	4.6098		52	3.07632		39	2.30724
	157	9.2787		78.5	4.63935		52.3333	3.09604		39.25	2.32203
	158	9.3378		79	4.6689		52.6667	3.11576		39.5	2.33682
	159	9.3969		79.5	4.69845		53	3.13548		39.75	2.35161
	160	9.456		80	4.728		53.3333	3.1552		40	2.3664
	161	9.5151		80.5	4.75755		53.6667	3.17492		40.25	2.38119
	162	9.5742		81	4.7871		54	3.19464		40.5	2.39598
	163	9.6333		81.5	4.81665		54.3333	3.21436		40.75	2.41077
	164	9.6924		82	4.8462		54.6667	3.23408		41	2.42556
	165	9.7515		82.5	4.87575		55	3.2538		41.25	2.44035
	166	9.8106		83	4.9053		55.3333	3.27352		41.5	2.45514
	167	9.8697		83.5	4.93485		55.6667	3.29324		41.75	2.46993
	168	9.9288		84	4.9644		56	3.31296		42	2.48472
	169	9.9879		84.5	4.99395		56.3333	3.33268		42.25	2.49951
	170	10.047		85	5.0235		56.6667	3.3524		42.5	2.5143
	171	10.1061		85.5	5.05305		57	3.37212		42.75	2.52909
	172	10.1652		86	5.0826		57.3333	3.39184		43	2.54388
	173	10.2243		86.5	5.11215		57.6667	3.41156		43.25	2.55867
	174	10.2834		87	5.1417		58	3.43128		43.5	2.57346
	175	10.3425		87.5	5.17125		58.3333	3.451		43.75	2.58825
	176	10.4016		88	5.2008		58.6667	3.47072		44	2.60304
	177	10.4607		88.5	5.23035		59	3.49044		44.25	2.61783
	178	10.5198		89	5.2599		59.3333	3.51016		44.5	2.63262
	179	10.5789		89.5	5.28945		59.6667	3.52988		44.75	2.64741
	180	10.638		90	5.319		60	3.5496		45	2.6622
	181	10.6971		90.5	5.34855		60.3333	3.56932		45.25	2.67699
	182	10.7562		91	5.3781		60.6667	3.58904		45.5	2.69178
	183	10.8153		91.5	5.40765		61	3.60876		45.75	2.70657
	184	10.8744		92	5.4372		61.3333	3.62848		46	2.72136
	185	10.9335		92.5	5.46675		61.6667	3.6482		46.25	2.73615
	186	10.9926		93	5.4963		62	3.66792		46.5	2.75094
	187	11.0517		93.5	5.52585		62.3333	3.68764		46.75	2.76573
	188	11.1108		94	5.5554		62.6667	3.70736		47	2.78052
	189	11.1699		94.5	5.58495		63	3.72708		47.25	2.79531
	190	11.229		95	5.6145		63.3333	3.7468		47.5	2.8101
	191	11.2881		95.5	5.64405		63.6667	3.76652		47.75	2.82489
	192	11.3472		96	5.6736		64	3.78624		48	2.83968
	193	11.4063		96.5	5.70315		64.3333	3.80596		48.25	2.85447
	194	11.4654		97	5.7327		64.6667	3.82568		48.5	2.86926
	195	11.5245		97.5	5.76225		65	3.8454		48.75	2.88405
	196	11.5836		98	5.7918		65.3333	3.86512		49	2.89884
	197	11.6427		98.5	5.82135		65.6667	3.88484		49.25	2.91363
	198	11.7018		99	5.8509		66	3.90456		49.5	2.92842
	199	11.7609		99.5	5.88045		66.3333	3.92428		49.75	2.94321
	200	11.82		100	5.91		66.6667	3.944		50	2.958
	201	11.8791		100.5	5.93955		67	3.96372		50.25	2.97279
	202	11.9382		101	5.9691		67.3333	3.98344		50.5	2.98758
	203	11.9973		101.5	5.99865		67.6667	4.00316		50.75	3.00237
	204	12.0564		102	6.0282		68	4.02288		51	3.01716
	205	12.1155		102.5	6.05775		68.3333	4.0426		51.25	3.03195
	206	12.1746		103	6.0873		68.6667	4.06232		51.5	3.04674
	207	12.2337		103.5	6.11685		69	4.08204		51.75	3.06153
	208	12.2928		104	6.1464		69.3333	4.10176		52	3.07632
	209	12.3519		104.5	6.17595		69.6667	4.12148		52.25	3.09111
	210	12.411		105	6.2055		70	4.1412		52.5	3.1059
				105.5	6.23505		70.3333	4.16092		52.75	3.12069
				106	6.2646		70.6667	4.18064		53	3.13548
				106.5	6.29415		71	4.20036		53.25	3.15027
				107	6.3237		71.3333	4.22008		53.5	3.16506
				107.5	6.35325		71.6667	4.2398		53.75	3.17985
				108	6.3828		72	4.25952		54	3.19464
				108.5	6.41235		72.3333	4.27924		54.25	3.20943
				109	6.4419		72.6667	4.29896		54.5	3.22422
				109.5	6.47145		73	4.31868		54.75	3.23901
				110	6.501		73.3333	4.3384		55	3.2538
				110.5	6.53055		73.6667	4.35812		55.25	3.26859
				111	6.5601		74	4.37784		55.5	3.28338
				111.5	6.58965		74.3333	4.39756		55.75	3.29817
				112	6.6192		74.6667	4.41728		56	3.31296
				112.5	6.64875		75	4.437		56.25	3.32775
				113	6.6783		75.3333	4.45672		56.5	3.34254
				113.5	6.70785		75.6667	4.47644		56.75	3.35733
				114	6.7374		76	4.49616		57	3.37212
				114.5	6.76695		76.3333	4.51588		57.25	3.38691
				115	6.7965		76.6667	4.5356		57.5	3.4017
				115.5	6.82605		77	4.55532		57.75	3.41649
				116	6.8556		77.3333	4.57504		58	3.43128
				116.5	6.88515		77.6667	4.59476		58.25	3.44607
				117	6.9147		78	4.61448		58.5	3.46086
				117.5	6.94425		78.3333	4.6342		58.75	3.47565
				118	6.9738		78.6667	4.65392		59	3.49044
				118.5	7.00335		79	4.67364		59.25	3.50523
				119	7.0329		79.3333	4.69336		59.5	3.52002
				119.5	7.06245		79.6667	4.71308		59.75	3.53481
				120	7.092		80	4.7328		60	3.5496
				120.5	7.12155		80.3333	4.75252		60.25	3.56439
				121	7.1511		80.6667	4.77224		60.5	3.57918
				121.5	7.18065		81	4.79196		60.75	3.59397
				122	7.2102		81.3333	4.81168		61	3.60876
				122.5	7.23975		81.6667	4.8314		61.25	3.62355
				123	7.2693		82	4.85112		61.5	3.63834
				123.5	7.29885		82.3333	4.87084		61.75	3.65313
				124	7.3284		82.6667	4.89056		62	3.66792
				124.5	7.35795		83	4.91028		62.25	3.68271
				125	7.3875		83.3333	4.93		62.5	3.6975
				125.5	7.41705		83.6667	4.94972		62.75	3.71229
				126	7.4466		84	4.96944		63	3.72708
				126.5	7.47615		84.3333	4.98916		63.25	3.74187
				127	7.5057		84.6667	5.00888		63.5	3.75666
				127.5	7.53525		85	5.0286		63.75	3.77145
				128	7.5648		85.3333	5.04832		64	3.78624
				128.5	7.59435		85.6667	5.06804		64.25	3.80103
				129	7.6239		86	5.08776		64.5	3.81582
				129.5	7.65345		86.3333	5.10748		64.75	3.83061
				130	7.683		86.6667	5.1272		65	3.8454
				130.5	7.71255		87	5.14692		65.25	3.86019
				131	7.7421		87.3333	5.16664		65.5	3.87498
				131.5	7.77165		87.6667	5.18636		65.75	3.88977
				132	7.8012		88	5.20608		66	3.90456
				132.5	7.83075		88.3333	5.2258		66.25	3.91935
				133	7.8603		88.6667	5.24552		66.5	3.93414
				133.5	7.88985		89	5.26524		66.75	3.94893
				134	7.9194		89.3333	5.28496		67	3.96372
				134.5	7.94895		89.6667	5.30468		67.25	3.97851
				135	7.9785		90	5.3244		67.5	3.9933
				135.5	8.00805		90.3333	5.34412		67.75	4.00809
				136	8.0376		90.6667	5.36384		68	4.02288
				136.5	8.06715		91	5.38356		68.25	4.03767
				137	8.0967		91.3333	5.40328		68.5	4.05246
				137.5	8.12625		91.6667	5.423		68.75	4.06725
				138	8.1558		92	5.44272		69	4.08204
				138.5	8.18535		92.3333	5.46244		69.25	4.09683
				139	8.2149		92.6667	5.48216		69.5	4.11162
				139.5	8.24445		93	5.50188		69.75	4.12641
				140	8.274		93.3333	5.5216		70	4.1412
				140.5	8.30355		93.6667	5.54132		70.25	4.15599
				141	8.3331		94	5.56104		70.5	4.17078
				141.5	8.36265		94.3333	5.58076		70.75	4.18557
				142	8.3922		94.6667	5.60048		71	4.20036
				142.5	8.42175		95	5.6202		71.25	4.21515
				143	8.4513		95.3333	5.63992		71.5	4.22994
				143.5	8.48085		95.6667	5.65964		71.75	4.24473
				144	8.5104		96	5.67936		72	4.25952
				144.5	8.53995		96.3333	5.69908		72.25	4.27431
				145	8.5695		96.6667	5.7188		72.5	4.2891
				145.5	8.59905		97	5.73852		72.75	4.30389
				146	8.6286		97.3333	5.75824		73	4.31868
				146.5	8.65815		97.6667	5.77796		73.25	4.33347
				147	8.6877		98	5.79768		73.5	4.34826
				147.5	8.71725		98.3333	5.8174		73.75	4.36305
				148	8.7468		98.6667	5.83712		74	4.37784
				148.5	8.77635		99	5.85684		74.25	4.39263
				149	8.8059		99.3333	5.87656		74.5	4.40742
				149.5	8.83545		99.6667	5.89628		74.75	4.42221
				150	8.865		100	5.916		75	4.437
				150.5	8.89455		100.333	5.93572		75.25	4.45179
				151	8.9241		100.667	5.95544		75.5	4.46658
				151.5	8.95365		101	5.97516		75.75	4.48137
				152	8.9832		101.333	5.99488		76	4.49616
				152.5	9.01275		101.667	6.0146		76.25	4.51095
				153	9.0423		102	6.03432		76.5	4.52574
				153.5	9.07185		102.333	6.05404		76.75	4.54053
				154	9.1014		102.667	6.07376		77	4.55532
				154.5	9.13095		103	6.09348		77.25	4.57011
				155	9.1605		103.333	6.1132		77.5	4.5849
				155.5	9.19005		103.667	6.13292		77.75	4.59969
				156	9.2196		104	6.15264		78	4.61448
				156.5	9.24915		104.333	6.17236		78.25	4.62927
				157	9.2787		104.667	6.19208		78.5	4.64406
				157.5	9.30825		105	6.2118		78.75	4.65885
				158	9.3378		105.333	6.23152		79	4.67364
				158.5	9.36735		105.667	6.25124		79.25	4.68843
				159	9.3969		106	6.27096		79.5	4.70322
				159.5	9.42645		106.333	6.29068		79.75	4.71801
				160	9.456		106.667	6.3104		80	4.7328
				160.5	9.48555		107	6.33012		80.25	4.74759
				161	9.5151		107.333	6.34984		80.5	4.76238
				161.5	9.54465		107.667	6.36956		80.75	4.77717
				162	9.5742		108	6.38928		81	4.79196
				162.5	9.60375		108.333	6.409		81.25	4.80675
				163	9.6333		108.667	6.42872		81.5	4.82154
				163.5	9.66285		109	6.44844		81.75	4.83633
				164	9.6924		109.333	6.46816		82	4.85112
				164.5	9.72195		109.667	6.48788		82.25	4.86591
				165	9.7515		110	6.5076		82.5	4.8807
				165.5	9.78105		110.333	6.52732		82.75	4.89549
				166	9.8106		110.667	6.54704		83	4.91028
				166.5	9.84015		111	6.56676		83.25	4.92507
				167	9.8697		111.333	6.58648		83.5	4.93986
				167.5	9.89925		111.667	6.6062		83.75	4.95465
				168	9.9288		112	6.62592		84	4.96944
				168.5	9.95835		112.333	6.64564		84.25	4.98423
				169	9.9879		112.667	6.66536		84.5	4.99902
				169.5	10.0175		113	6.68508		84.75	5.01381
				170	10.047		113.333	6.7048		85	5.0286
				170.5	10.0765		113.667	6.72452		85.25	5.04339
				171	10.1061		114	6.74424		85.5	5.05818
				171.5	10.1357		114.333	6.76396		85.75	5.07297
				172	10.1652		114.667	6.78368		86	5.08776
				172.5	10.1948		115	6.8034		86.25	5.10255
				173	10.2243		115.333	6.82312		86.5	5.11734
				173.5	10.2538		115.667	6.84284		86.75	5.13213
				174	10.2834		116	6.86256		87	5.14692
				174.5	10.313		116.333	6.88228		87.25	5.16171
				175	10.3425		116.667	6.902		87.5	5.1765
				175.5	10.372		117	6.92172		87.75	5.19129
				176	10.4016		117.333	6.94144		88	5.20608
				176.5	10.4312		117.667	6.96116		88.25	5.22087
				177	10.4607		118	6.98088		88.5	5.23566
				177.5	10.4902		118.333	7.0006		88.75	5.25045
				178	10.5198		118.667	7.02032		89	5.26524
				178.5	10.5494		119	7.04004		89.25	5.28003
				179	10.5789		119.333	7.05976		89.5	5.29482
				179.5	10.6084		119.667	7.07948		89.75	5.30961
				180	10.638		120	7.0992		90	5.3244
				180.5	10.6676		120.333	7.11892		90.25	5.33919
				181	10.6971		120.667	7.13864		90.5	5.35398
				181.5	10.7266		121	7.15836		90.75	5.36877
				182	10.7562		121.333	7.17808		91	5.38356
				182.5	10.7858		121.667	7.1978		91.25	5.39835
				183	10.8153		122	7.21752		91.5	5.41314
				183.5	10.8448		122.333	7.23724		91.75	5.42793
				184	10.8744		122.667	7.25696		92	5.44272
				184.5	10.904		123	7.27668		92.25	5.45751
				185	10.9335		123.333	7.2964		92.5	5.4723
				185.5	10.9631		123.667	7.31612		92.75	5.48709
				186	10.9926		124	7.33584		93	5.50188
				186.5	11.0221		124.333	7.35556		93.25	5.51667
				187	11.0517		124.667	7.37528		93.5	5.53146
				187.5	11.0813		125	7.395		93.75	5.54625
				188	11.1108		125.333	7.41472		94	5.56104
				188.5	11.1403		125.667	7.43444		94.25	5.57583
				189	11.1699		126	7.45416		94.5	5.59062
				189.5	11.1995		126.333	7.47388		94.75	5.60541
				190	11.229		126.667	7.4936		95	5.6202
				190.5	11.2585		127	7.51332		95.25	5.63499
				191	11.2881		127.333	7.53304		95.5	5.64978
				191.5	11.3177		127.667	7.55276		95.75	5.66457
				192	11.3472		128	7.57248		96	5.67936
				192.5	11.3767		128.333	7.5922		96.25	5.69415
				193	11.4063		128.667	7.61192		96.5	5.70894
				193.5	11.4359		129	7.63164		96.75	5.72373
				194	11.4654		129.333	7.65136		97	5.73852
				194.5	11.4949		129.667	7.67108		97.25	5.75331
				195	11.5245		130	7.6908		97.5	5.7681
				195.5	11.5541		130.333	7.71052		97.75	5.78289
				196	11.5836		130.667	7.73024		98	5.79768
				196.5	11.6131		131	7.74996		98.25	5.81247
				197	11.6427		131.333	7.76968		98.5	5.82726
				197.5	11.6723		131.667	7.7894		98.75	5.84205
				198	11.7018		132	7.80912		99	5.85684
				198.5	11.7314		132.333	7.82884		99.25	5.87163
				199	11.7609		132.667	7.84856		99.5	5.88642
				199.5	11.7904		133	7.86828		99.75	5.90121
				200	11.82		133.333	7.888		100	5.916
				200.5	11.8496		133.667	7.90772		100.25	5.93079
				201	11.8791		134	7.92744		100.5	5.94558
				201.5	11.9086		134.333	7.94716		100.75	5.96037
				202	11.9382		134.667	7.96688		101	5.97516
				202.5	11.9678		135	7.9866		101.25	5.98995
				203	11.9973		135.333	8.00632		101.5	6.00474
				203.5	12.0268		135.667	8.02604		101.75	6.01953
				204	12.0564		136	8.04576		102	6.03432
				204.5	12.086		136.333	8.06548		102.25	6.04911
				205	12.1155		136.667	8.0852		102.5	6.0639
				205.5	12.145		137	8.10492		102.75	6.07869
				206	12.1746		137.333	8.12464		103	6.09348
				206.5	12.2042		137.667	8.14436		103.25	6.10827
				207	12.2337		138	8.16408		103.5	6.12306
				207.5	12.2632		138.333	8.1838		103.75	6.13785
				208	12.2928		138.667	8.20352		104	6.15264
				208.5	12.3224		139	8.22324		104.25	6.16743
				209	12.3519		139.333	8.24296		104.5	6.18222
				209.5	12.3814		139.667	8.26268		104.75	6.19701
				210	12.411		140	8.2824		105	6.2118
							140.333	8.30212		105.25	6.22659
							140.667	8.32184		105.5	6.24138
							141	8.34156		105.75	6.25617
							141.333	8.36128		106	6.27096
							141.667	8.381		106.25	6.28575
							142	8.40072		106.5	6.30054
							142.333	8.42044		106.75	6.31533
							142.667	8.44016		107	6.33012
							143	8.45988		107.25	6.34491
							143.333	8.4796		107.5	6.3597
							143.667	8.49932		107.75	6.37449
							144	8.51904		108	6.38928
							144.333	8.53876		108.25	6.40407
							144.667	8.55848		108.5	6.41886
							145	8.5782		108.75	6.43365
							145.333	8.59792		109	6.44844
							145.667	8.61764		109.25	6.46323
							146	8.63736		109.5	6.47802
							146.333	8.65708		109.75	6.49281
							146.667	8.6768		110	6.5076
							147	8.69652		110.25	6.52239
							147.333	8.71624		110.5	6.53718
							147.667	8.73596		110.75	6.55197
							148	8.75568		111	6.56676
							148.333	8.7754		111.25	6.58155
							148.667	8.79512		111.5	6.59634
							149	8.81484		111.75	6.61113
							149.333	8.83456		112	6.62592
							149.667	8.85428		112.25	6.64071
							150	8.874		112.5	6.6555
							150.333	8.89372		112.75	6.67029
							150.667	8.91344		113	6.68508
							151	8.93316		113.25	6.69987
							151.333	8.95288		113.5	6.71466
							151.667	8.9726		113.75	6.72945
							152	8.99232		114	6.74424
							152.333	9.01204		114.25	6.75903
							152.667	9.03176		114.5	6.77382
							153	9.05148		114.75	6.78861
							153.333	9.0712		115	6.8034
							153.667	9.09092		115.25	6.81819
							154	9.11064		115.5	6.83298
							154.333	9.13036		115.75	6.84777
							154.667	9.15008		116	6.86256
							155	9.1698		116.25	6.87735
							155.333	9.18952		116.5	6.89214
							155.667	9.20924		116.75	6.90693
							156	9.22896		117	6.92172
							156.333	9.24868		117.25	6.93651
							156.667	9.2684		117.5	6.9513
							157	9.28812		117.75	6.96609
							157.333	9.30784		118	6.98088
							157.667	9.32756		118.25	6.99567
							158	9.34728		118.5	7.01046
							158.333	9.367		118.75	7.02525
							158.667	9.38672		119	7.04004
							159	9.40644		119.25	7.05483
							159.333	9.42616		119.5	7.06962
							159.667	9.44588		119.75	7.08441
							160	9.4656		120	7.0992
							160.333	9.48532		120.25	7.11399
							160.667	9.50504		120.5	7.12878
							161	9.52476		120.75	7.14357
							161.333	9.54448		121	7.15836
							161.667	9.5642		121.25	7.17315
							162	9.58392		121.5	7.18794
							162.333	9.60364		121.75	7.20273
							162.667	9.62336		122	7.21752
							163	9.64308		122.25	7.23231
							163.333	9.6628		122.5	7.2471
							163.667	9.68252		122.75	7.26189
							164	9.70224		123	7.27668
							164.333	9.72196		123.25	7.29147
							164.667	9.74168		123.5	7.30626
							165	9.7614		123.75	7.32105
							165.333	9.78112		124	7.33584
							165.667	9.80084		124.25	7.35063
							166	9.82056		124.5	7.36542
							166.333	9.84028		124.75	7.38021
							166.667	9.86		125	7.395
							167	9.87972		125.25	7.40979
							167.333	9.89944		125.5	7.42458
							167.667	9.91916		125.75	7.43937
							168	9.93888		126	7.45416
							168.333	9.9586		126.25	7.46895
							168.667	9.97832		126.5	7.48374
							169	9.99804		126.75	7.49853
							169.333	10.0178		127	7.51332
							169.667	10.0375		127.25	7.52811
							170	10.0572		127.5	7.5429
							170.333	10.0769		127.75	7.55769
							170.667	10.0966		128	7.57248
							171	10.1164		128.25	7.58727
							171.333	10.1361		128.5	7.60206
							171.667	10.1558		128.75	7.61685
							172	10.1755		129	7.63164
							172.333	10.1952		129.25	7.64643
							172.667	10.215		129.5	7.66122
							173	10.2347		129.75	7.67601
							173.333	10.2544		130	7.6908
							173.667	10.2741		130.25	7.70559
							174	10.2938		130.5	7.72038
							174.333	10.3136		130.75	7.73517
							174.667	10.3333		131	7.74996
							175	10.353		131.25	7.76475
							175.333	10.3727		131.5	7.77954
							175.667	10.3924		131.75	7.79433
							176	10.4122		132	7.80912
							176.333	10.4319		132.25	7.82391
							176.667	10.4516		132.5	7.8387
							177	10.4713		132.75	7.85349
							177.333	10.491		133	7.86828
							177.667	10.5108		133.25	7.88307
							178	10.5305		133.5	7.89786
							178.333	10.5502		133.75	7.91265
							178.667	10.5699		134	7.92744
							179	10.5896		134.25	7.94223
							179.333	10.6094		134.5	7.95702
							179.667	10.6291		134.75	7.97181
							180	10.6488		135	7.9866
							180.333	10.6685		135.25	8.00139
							180.667	10.6882		135.5	8.01618
							181	10.708		135.75	8.03097
							181.333	10.7277		136	8.04576
							181.667	10.7474		136.25	8.06055
							182	10.7671		136.5	8.07534
							182.333	10.7868		136.75	8.09013
							182.667	10.8066		137	8.10492
							183	10.8263		137.25	8.11971
							183.333	10.846		137.5	8.1345
							183.667	10.8657		137.75	8.14929
							184	10.8854		138	8.16408
							184.333	10.9052		138.25	8.17887
							184.667	10.9249		138.5	8.19366
							185	10.9446		138.75	8.20845
							185.333	10.9643		139	8.22324
							185.667	10.984		139.25	8.23803
							186	11.0038		139.5	8.25282
							186.333	11.0235		139.75	8.26761
							186.667	11.0432		140	8.2824
							187	11.0629		140.25	8.29719
							187.333	11.0826		140.5	8.31198
							187.667	11.1024		140.75	8.32677
							188	11.1221		141	8.34156
							188.333	11.1418		141.25	8.35635
							188.667	11.1615		141.5	8.37114
							189	11.1812		141.75	8.38593
							189.333	11.201		142	8.40072
							189.667	11.2207		142.25	8.41551
							190	11.2404		142.5	8.4303
							190.333	11.2601		142.75	8.44509
							190.667	11.2798		143	8.45988
							191	11.2996		143.25	8.47467
							191.333	11.3193		143.5	8.48946
							191.667	11.339		143.75	8.50425
							192	11.3587		144	8.51904
							192.333	11.3784		144.25	8.53383
							192.667	11.3982		144.5	8.54862
							193	11.4179		144.75	8.56341
							193.333	11.4376		145	8.5782
							193.667	11.4573		145.25	8.59299
							194	11.477		145.5	8.60778
							194.333	11.4968		145.75	8.62257
							194.667	11.5165		146	8.63736
							195	11.5362		146.25	8.65215
							195.333	11.5559		146.5	8.66694
							195.667	11.5756		146.75	8.68173
							196	11.5954		147	8.69652
							196.333	11.6151		147.25	8.71131
							196.667	11.6348		147.5	8.7261
							197	11.6545		147.75	8.74089
							197.333	11.6742		148	8.75568
							197.667	11.694		148.25	8.77047
							198	11.7137		148.5	8.78526
							198.333	11.7334		148.75	8.80005
							198.667	11.7531		149	8.81484
							199	11.7728		149.25	8.82963
							199.333	11.7926		149.5	8.84442
							199.667	11.8123		149.75	8.85921
							200	11.832		150	8.874
							200.333	11.8517		150.25	8.88879
							200.667	11.8714		150.5	8.90358
							201	11.8912		150.75	8.91837
							201.333	11.9109		151	8.93316
							201.667	11.9306		151.25	8.94795
							202	11.9503		151.5	8.96274
							202.333	11.97		151.75	8.97753
							202.667	11.9898		152	8.99232
							203	12.0095		152.25	9.00711
							203.333	12.0292		152.5	9.0219
							203.667	12.0489		152.75	9.03669
							204	12.0686		153	9.05148
							204.333	12.0884		153.25	9.06627
							204.667	12.1081		153.5	9.08106
							205	12.1278		153.75	9.09585
							205.333	12.1475		154	9.11064
							205.667	12.1672		154.25	9.12543
							206	12.187		154.5	9.14022
							206.333	12.2067		154.75	9.15501
							206.667	12.2264		155	9.1698
							207	12.2461		155.25	9.18459
							207.333	12.2658		155.5	9.19938
							207.667	12.2856		155.75	9.21417
							208	12.3053		156	9.22896
							208.333	12.325		156.25	9.24375
							208.667	12.3447		156.5	9.25854
							209	12.3644		156.75	9.27333
							209.333	12.3842		157	9.28812
							209.667	12.4039		157.25	9.30291
							210	12.4236		157.5	9.3177
										157.75	9.33249
										158	9.34728
										158.25	9.36207
										158.5	9.37686
										158.75	9.39165
										159	9.40644
										159.25	9.42123
										159.5	9.43602
										159.75	9.45081
										160	9.4656
										160.25	9.48039
										160.5	9.49518
										160.75	9.50997
										161	9.52476
										161.25	9.53955
										161.5	9.55434
										161.75	9.56913
										162	9.58392
										162.25	9.59871
										162.5	9.6135
										162.75	9.62829
										163	9.64308
										163.25	9.65787
										163.5	9.67266
										163.75	9.68745
										164	9.70224
										164.25	9.71703
										164.5	9.73182
										164.75	9.74661
										165	9.7614
										165.25	9.77619
										165.5	9.79098
										165.75	9.80577
										166	9.82056
										166.25	9.83535
										166.5	9.85014
										166.75	9.86493
										167	9.87972
										167.25	9.89451
										167.5	9.9093
										167.75	9.92409
										168	9.93888
										168.25	9.95367
										168.5	9.96846
										168.75	9.98325
										169	9.99804
										169.25	10.0128
										169.5	10.0276
										169.75	10.0424
										170	10.0572
										170.25	10.072
										170.5	10.0868
										170.75	10.1016
										171	10.1164
										171.25	10.1311
										171.5	10.1459
										171.75	10.1607
										172	10.1755
										172.25	10.1903
										172.5	10.2051
										172.75	10.2199
										173	10.2347
										173.25	10.2495
										173.5	10.2643
										173.75	10.279
										174	10.2938
										174.25	10.3086
										174.5	10.3234
										174.75	10.3382
										175	10.353
										175.25	10.3678
										175.5	10.3826
										175.75	10.3974
										176	10.4122
										176.25	10.4269
										176.5	10.4417
										176.75	10.4565
										177	10.4713
										177.25	10.4861
										177.5	10.5009
										177.75	10.5157
										178	10.5305
										178.25	10.5453
										178.5	10.5601
										178.75	10.5748
										179	10.5896
										179.25	10.6044
										179.5	10.6192
										179.75	10.634
										180	10.6488
										180.25	10.6636
										180.5	10.6784
										180.75	10.6932
										181	10.708
										181.25	10.7227
										181.5	10.7375
										181.75	10.7523
										182	10.7671
										182.25	10.7819
										182.5	10.7967
										182.75	10.8115
										183	10.8263
										183.25	10.8411
										183.5	10.8559
										183.75	10.8706
										184	10.8854
										184.25	10.9002
										184.5	10.915
										184.75	10.9298
										185	10.9446
										185.25	10.9594
										185.5	10.9742
										185.75	10.989
										186	11.0038
										186.25	11.0185
										186.5	11.0333
										186.75	11.0481
										187	11.0629
										187.25	11.0777
										187.5	11.0925
										187.75	11.1073
										188	11.1221
										188.25	11.1369
										188.5	11.1517
										188.75	11.1664
										189	11.1812
										189.25	11.196
										189.5	11.2108
										189.75	11.2256
										190	11.2404
										190.25	11.2552
										190.5	11.27
										190.75	11.2848
										191	11.2996
										191.25	11.3143
										191.5	11.3291
										191.75	11.3439
										192	11.3587
										192.25	11.3735
										192.5	11.3883
										192.75	11.4031
										193	11.4179
										193.25	11.4327
										193.5	11.4475
										193.75	11.4622
										194	11.477
										194.25	11.4918
										194.5	11.5066
										194.75	11.5214
										195	11.5362
										195.25	11.551
										195.5	11.5658
										195.75	11.5806
										196	11.5954
										196.25	11.6102
										196.5	11.6249
										196.75	11.6397
										197	11.6545
										197.25	11.6693
										197.5	11.6841
										197.75	11.6989
										198	11.7137
										198.25	11.7285
										198.5	11.7433
										198.75	11.7581
										199	11.7728
										199.25	11.7876
										199.5	11.8024
										199.75	11.8172
										200	11.832
										200.25	11.8468
										200.5	11.8616
										200.75	11.8764
										201	11.8912
										201.25	11.906
										201.5	11.9207
										201.75	11.9355
										202	11.9503
										202.25	11.9651
										202.5	11.9799
										202.75	11.9947
										203	12.0095
										203.25	12.0243
										203.5	12.0391
										203.75	12.0539
										204	12.0686
										204.25	12.0834
										204.5	12.0982
										204.75	12.113
										205	12.1278
										205.25	12.1426
										205.5	12.1574
										205.75	12.1722
										206	12.187
										206.25	12.2018
										206.5	12.2165
										206.75	12.2313
										207	12.2461
										207.25	12.2609
										207.5	12.2757
										207.75	12.2905
										208	12.3053
										208.25	12.3201
										208.5	12.3349
										208.75	12.3497
										209	12.3644
										209.25	12.3792
										209.5	12.394
										209.75	12.4088
										210	12.4236
